# Supplementary material for: Comprehensive pharmacovigilance analysis of belumosudil: A real-world study using the FDA adverse event reporting system (FAERS)
Source: Research Square preprint supplement (doi:10.21203/rs.3.rs-6215878/v1), 2025-03-27
Supplement: Supplementary file 1 [file d3b007bd020c6291fb28d774.docx]

Supplementary Material

**Supplementary Tables**

Supplementary Table S1**.** Two-by-two contingency table for disproportionality analyses.

|  | Target AEs | Other AEs | Total |
| --- | --- | --- | --- |
| belumosudil | a | b | a+b |
| Other drugs | c | d | c+d |
| Total | a+c | b+d | a+b+c+d |

Abbreviations: AEs, adverse events; a, number of reports containing both the target drug and target adverse drug reaction; b, number of reports containing other adverse drug reaction of the target drug; c, number of reports containing the target adverse drug reaction of other drugs; d, number of reports containing other drugs and other adverse drug reactions.

Supplementary Table S2: Summary of four algorithms used for signal detection

| Algorithms | Equation | Criteria |
| --- | --- | --- |
| ROR |  | lower limit of 95% CI>1, a≥3 |
| 95%CI=eln(ROR)±1.96(+++)^0.5 |
| PRR |  | PRR≥2, χ2≥4, a≥3 |
|  |
| BCPNN |  | IC025>0 |
| 95%CI= E(IC) ± 2V(IC)^0.5 |
| MGPS |  | EBGM05>2 |
| 95%CI=eln(EBGM)±1.96(+++)^0.5 |

Abbreviation: a, number of reports containing both the target drug and target adverse event; b, number of reports containing other adverse event of the target drug; c, number of reports containing the target adverse event of other drugs; d, number of reports containing other drugs and other adverse event. 95%CI, 95% confidence interval; χ2, chi-squared; ROR, reporting odds ratio; PRR,proportional reporting ratio; IC, information component; IC025, the lower limit of 95% CI of the IC; E(IC), the IC expectations; V(IC), the variance of IC; EBGM, empirical Bayesian geometric mean; EBGM05, the lower limit of 95% CI of EBGM.

Supplementary Table S3. All adverse events meeting the positive signal threshold at the PT levels.

| PT | Case reports | ROR (95% Cl) | PRR (χ2) | EBGM (EBGM05) | IC (IC025) |
| --- | --- | --- | --- | --- | --- |
| Inappropriate Schedule Of Product Administration | 255 | 8.69 ( 7.66 - 9.85 ) | 8.35 ( 1652.86 ) | 8.32 ( 7.49 ) | 3.06 ( 2.87 ) |
| Product Use In Unapproved Indication | 207 | 6.33 ( 5.51 - 7.27 ) | 6.14 ( 893.22 ) | 6.12 ( 5.45 ) | 2.61 ( 2.41 ) |
| Fatigue | 200 | 2.7 ( 2.34 - 3.11 ) | 2.64 ( 206.52 ) | 2.64 ( 2.35 ) | 1.4 ( 1.19 ) |
| Product Dose Omission Issue | 128 | 2.16 ( 1.82 - 2.58 ) | 2.14 ( 78.37 ) | 2.14 ( 1.85 ) | 1.1 ( 0.84 ) |
| Nausea | 121 | 1.9 ( 1.59 - 2.28 ) | 1.88 ( 50.76 ) | 1.88 ( 1.62 ) | 0.91 ( 0.65 ) |
| Condition Aggravated | 114 | 3.23 ( 2.68 - 3.88 ) | 3.18 ( 171.44 ) | 3.18 ( 2.72 ) | 1.67 ( 1.4 ) |
| Diarrhoea | 106 | 1.74 ( 1.43 - 2.1 ) | 1.72 ( 32.44 ) | 1.72 ( 1.47 ) | 0.78 ( 0.5 ) |
| Death | 100 | 1.3 ( 1.06 - 1.58 ) | 1.29 ( 6.63 ) | 1.29 ( 1.09 ) | 0.37 ( 0.08 ) |
| Dyspnoea | 94 | 2.01 ( 1.64 - 2.46 ) | 1.99 ( 46.6 ) | 1.99 ( 1.68 ) | 0.99 ( 0.69 ) |
| Pneumonia | 77 | 2.75 ( 2.19 - 3.44 ) | 2.72 ( 84.21 ) | 2.72 ( 2.25 ) | 1.44 ( 1.11 ) |
| Covid-19 | 74 | 1.49 ( 1.19 - 1.88 ) | 1.49 ( 11.93 ) | 1.49 ( 1.23 ) | 0.57 ( 0.24 ) |
| Asthenia | 73 | 2.33 ( 1.85 - 2.93 ) | 2.31 ( 54.61 ) | 2.31 ( 1.9 ) | 1.21 ( 0.87 ) |
| Hospitalisation | 69 | 4.02 ( 3.17 - 5.09 ) | 3.98 ( 154.24 ) | 3.98 ( 3.26 ) | 1.99 ( 1.64 ) |
| Cough | 62 | 2.19 ( 1.7 - 2.81 ) | 2.17 ( 39.51 ) | 2.17 ( 1.76 ) | 1.12 ( 0.75 ) |
| Rash | 60 | 1.5 ( 1.16 - 1.94 ) | 1.5 ( 9.92 ) | 1.5 ( 1.21 ) | 0.58 ( 0.21 ) |
| Decreased Appetite | 53 | 2.44 ( 1.86 - 3.2 ) | 2.43 ( 44.71 ) | 2.43 ( 1.94 ) | 1.28 ( 0.89 ) |
| Muscle Spasms | 48 | 3.37 ( 2.54 - 4.48 ) | 3.35 ( 79.35 ) | 3.35 ( 2.64 ) | 1.74 ( 1.33 ) |
| Nasopharyngitis | 42 | 2.25 ( 1.66 - 3.04 ) | 2.24 ( 28.79 ) | 2.24 ( 1.73 ) | 1.16 ( 0.72 ) |
| Fall | 41 | 1.49 ( 1.1 - 2.02 ) | 1.49 ( 6.54 ) | 1.49 ( 1.15 ) | 0.57 ( 0.12 ) |
| Dry Eye | 38 | 6.69 ( 4.86 - 9.21 ) | 6.65 ( 182.23 ) | 6.64 ( 5.08 ) | 2.73 ( 2.27 ) |
| Abdominal Discomfort | 38 | 2.29 ( 1.67 - 3.15 ) | 2.28 ( 27.45 ) | 2.28 ( 1.75 ) | 1.19 ( 0.73 ) |
| Hepatic Enzyme Increased | 33 | 4.8 ( 3.4 - 6.75 ) | 4.77 ( 98.39 ) | 4.77 ( 3.58 ) | 2.25 ( 1.76 ) |
| Blood Pressure Increased | 32 | 2.22 ( 1.57 - 3.15 ) | 2.22 ( 21.38 ) | 2.21 ( 1.66 ) | 1.15 ( 0.64 ) |
| Abdominal Pain Upper | 31 | 1.8 ( 1.26 - 2.56 ) | 1.79 ( 10.93 ) | 1.79 ( 1.34 ) | 0.84 ( 0.33 ) |
| Infection | 29 | 1.99 ( 1.38 - 2.86 ) | 1.98 ( 14.17 ) | 1.98 ( 1.46 ) | 0.99 ( 0.46 ) |
| Platelet Count Decreased | 29 | 2.76 ( 1.91 - 3.97 ) | 2.75 ( 32.29 ) | 2.75 ( 2.02 ) | 1.46 ( 0.93 ) |
| Peripheral Swelling | 29 | 1.66 ( 1.15 - 2.39 ) | 1.66 ( 7.61 ) | 1.66 ( 1.22 ) | 0.73 ( 0.2 ) |
| Disease Progression | 28 | 2.08 ( 1.44 - 3.02 ) | 2.08 ( 15.67 ) | 2.08 ( 1.52 ) | 1.05 ( 0.52 ) |
| Myalgia | 27 | 2.13 ( 1.46 - 3.11 ) | 2.13 ( 16.17 ) | 2.13 ( 1.55 ) | 1.09 ( 0.54 ) |
| Haemoglobin Decreased | 26 | 3.17 ( 2.16 - 4.67 ) | 3.16 ( 38.5 ) | 3.16 ( 2.29 ) | 1.66 ( 1.1 ) |
| Depressed Mood | 25 | 5.5 ( 3.71 - 8.15 ) | 5.48 ( 91.55 ) | 5.48 ( 3.94 ) | 2.45 ( 1.89 ) |
| Dry Mouth | 23 | 3.59 ( 2.39 - 5.42 ) | 3.58 ( 42.85 ) | 3.58 ( 2.54 ) | 1.84 ( 1.25 ) |
| Gastrointestinal Disorder | 22 | 2.25 ( 1.48 - 3.43 ) | 2.25 ( 15.27 ) | 2.25 ( 1.58 ) | 1.17 ( 0.57 ) |
| Influenza | 21 | 2.06 ( 1.34 - 3.17 ) | 2.06 ( 11.43 ) | 2.06 ( 1.44 ) | 1.04 ( 0.42 ) |
| Neuropathy Peripheral | 19 | 2.03 ( 1.29 - 3.18 ) | 2.03 ( 9.87 ) | 2.02 ( 1.39 ) | 1.02 ( 0.37 ) |
| Loss Of Personal Independence In Daily Activities | 18 | 2.36 ( 1.49 - 3.75 ) | 2.36 ( 14.07 ) | 2.36 ( 1.6 ) | 1.24 ( 0.57 ) |
| Lung Disorder | 18 | 4.05 ( 2.55 - 6.44 ) | 4.04 ( 41.2 ) | 4.04 ( 2.74 ) | 2.01 ( 1.35 ) |
| Product Dose Omission In Error | 17 | 2.98 ( 1.85 - 4.8 ) | 2.98 ( 22.3 ) | 2.97 ( 2 ) | 1.57 ( 0.89 ) |
| Thrombosis | 17 | 2.59 ( 1.61 - 4.17 ) | 2.58 ( 16.49 ) | 2.58 ( 1.73 ) | 1.37 ( 0.69 ) |
| Emotional Disorder | 17 | 7.34 ( 4.56 - 11.82 ) | 7.32 ( 92.54 ) | 7.3 ( 4.9 ) | 2.87 ( 2.19 ) |
| Stomatitis | 15 | 2.44 ( 1.47 - 4.05 ) | 2.44 ( 12.73 ) | 2.44 ( 1.59 ) | 1.29 ( 0.56 ) |
| Dyspepsia | 15 | 1.88 ( 1.13 - 3.12 ) | 1.88 ( 6.18 ) | 1.88 ( 1.23 ) | 0.91 ( 0.19 ) |
| Muscular Weakness | 15 | 1.67 ( 1 - 2.77 ) | 1.66 ( 3.99 ) | 1.66 ( 1.09 ) | 0.74 ( 0.01 ) |
| Contusion | 15 | 1.75 ( 1.05 - 2.91 ) | 1.75 ( 4.82 ) | 1.75 ( 1.14 ) | 0.81 ( 0.08 ) |
| Bone Pain | 14 | 3.1 ( 1.83 - 5.24 ) | 3.1 ( 19.85 ) | 3.09 ( 1.99 ) | 1.63 ( 0.88 ) |
| Blood Creatinine Increased | 13 | 2.49 ( 1.45 - 4.3 ) | 2.49 ( 11.59 ) | 2.49 ( 1.58 ) | 1.32 ( 0.54 ) |
| Cataract | 13 | 2.23 ( 1.3 - 3.85 ) | 2.23 ( 8.83 ) | 2.23 ( 1.41 ) | 1.16 ( 0.38 ) |
| Skin Tightness | 13 | 42.81 ( 24.74 - 74.08 ) | 42.72 ( 521.67 ) | 42.09 ( 26.6 ) | 5.4 ( 4.62 ) |
| Bronchitis | 13 | 2.35 ( 1.36 - 4.05 ) | 2.35 ( 10.07 ) | 2.35 ( 1.49 ) | 1.23 ( 0.46 ) |
| Oedema | 13 | 3.04 ( 1.76 - 5.24 ) | 3.04 ( 17.76 ) | 3.03 ( 1.92 ) | 1.6 ( 0.83 ) |
| Gastrooesophageal Reflux Disease | 12 | 1.87 ( 1.06 - 3.3 ) | 1.87 ( 4.86 ) | 1.87 ( 1.16 ) | 0.9 ( 0.1 ) |
| Skin Disorder | 12 | 3.35 ( 1.9 - 5.91 ) | 3.35 ( 19.73 ) | 3.34 ( 2.08 ) | 1.74 ( 0.94 ) |
| Limb Discomfort | 12 | 3.79 ( 2.15 - 6.69 ) | 3.79 ( 24.61 ) | 3.78 ( 2.36 ) | 1.92 ( 1.12 ) |
| Gastroenteritis Viral | 12 | 7.06 ( 4.01 - 12.45 ) | 7.05 ( 62.17 ) | 7.04 ( 4.38 ) | 2.81 ( 2.01 ) |
| Blood Cholesterol Increased | 12 | 3.04 ( 1.72 - 5.36 ) | 3.04 ( 16.37 ) | 3.03 ( 1.89 ) | 1.6 ( 0.8 ) |
| Viral Infection | 11 | 3.82 ( 2.11 - 6.9 ) | 3.81 ( 22.77 ) | 3.81 ( 2.32 ) | 1.93 ( 1.09 ) |
| Renal Disorder | 11 | 2.72 ( 1.51 - 4.92 ) | 2.72 ( 11.94 ) | 2.72 ( 1.66 ) | 1.44 ( 0.61 ) |
| Decreased Activity | 10 | 7.83 ( 4.2 - 14.57 ) | 7.81 ( 59.27 ) | 7.8 ( 4.64 ) | 2.96 ( 2.09 ) |
| Blood Bilirubin Increased | 10 | 5.81 ( 3.12 - 10.8 ) | 5.8 ( 39.63 ) | 5.79 ( 3.44 ) | 2.53 ( 1.66 ) |
| Skin Discolouration | 10 | 2.77 ( 1.49 - 5.15 ) | 2.77 ( 11.28 ) | 2.76 ( 1.64 ) | 1.47 ( 0.6 ) |
| Bacterial Infection | 10 | 5.48 ( 2.95 - 10.2 ) | 5.48 ( 36.52 ) | 5.47 ( 3.25 ) | 2.45 ( 1.58 ) |
| Gastrointestinal Haemorrhage | 10 | 2.71 ( 1.46 - 5.05 ) | 2.71 ( 10.8 ) | 2.71 ( 1.61 ) | 1.44 ( 0.57 ) |
| Muscle Tightness | 9 | 7.68 ( 3.99 - 14.78 ) | 7.67 ( 52.04 ) | 7.65 ( 4.42 ) | 2.94 ( 2.02 ) |
| Osteonecrosis | 9 | 2.49 ( 1.29 - 4.78 ) | 2.48 ( 7.97 ) | 2.48 ( 1.44 ) | 1.31 ( 0.4 ) |
| Therapeutic Response Unexpected | 9 | 2.64 ( 1.37 - 5.07 ) | 2.63 ( 9.12 ) | 2.63 ( 1.52 ) | 1.4 ( 0.48 ) |
| Cellulitis | 9 | 2.25 ( 1.17 - 4.33 ) | 2.25 ( 6.23 ) | 2.25 ( 1.3 ) | 1.17 ( 0.25 ) |
| Liver Function Test Increased | 9 | 3.62 ( 1.88 - 6.96 ) | 3.61 ( 17.01 ) | 3.61 ( 2.09 ) | 1.85 ( 0.94 ) |
| Scleroderma | 9 | 33.09 ( 17.14 - 63.87 ) | 33.04 ( 276.34 ) | 32.66 ( 18.84 ) | 5.03 ( 4.11 ) |
| Fluid Retention | 9 | 2.33 ( 1.21 - 4.47 ) | 2.32 ( 6.78 ) | 2.32 ( 1.34 ) | 1.22 ( 0.3 ) |
| White Blood Cell Count Increased | 8 | 2.93 ( 1.46 - 5.87 ) | 2.93 ( 10.15 ) | 2.93 ( 1.64 ) | 1.55 ( 0.59 ) |
| Blood Potassium Decreased | 8 | 3.36 ( 1.68 - 6.72 ) | 3.35 ( 13.21 ) | 3.35 ( 1.88 ) | 1.74 ( 0.78 ) |
| Spinal Fracture | 8 | 4.51 ( 2.26 - 9.04 ) | 4.51 ( 21.82 ) | 4.5 ( 2.52 ) | 2.17 ( 1.21 ) |
| Red Blood Cell Count Decreased | 8 | 2.77 ( 1.38 - 5.55 ) | 2.77 ( 9.03 ) | 2.77 ( 1.55 ) | 1.47 ( 0.5 ) |
| Musculoskeletal Discomfort | 8 | 5 ( 2.5 - 10.01 ) | 5 ( 25.53 ) | 4.99 ( 2.79 ) | 2.32 ( 1.36 ) |
| Wound | 8 | 2.12 ( 1.06 - 4.24 ) | 2.12 ( 4.7 ) | 2.11 ( 1.18 ) | 1.08 ( 0.12 ) |
| Hip Fracture | 8 | 2.96 ( 1.48 - 5.93 ) | 2.96 ( 10.36 ) | 2.96 ( 1.65 ) | 1.56 ( 0.6 ) |
| Eye Disorder | 7 | 2.38 ( 1.13 - 4.99 ) | 2.38 ( 5.58 ) | 2.37 ( 1.28 ) | 1.25 ( 0.23 ) |
| Skin Cancer | 7 | 2.26 ( 1.08 - 4.74 ) | 2.26 ( 4.9 ) | 2.26 ( 1.21 ) | 1.17 ( 0.15 ) |
| Choking | 7 | 4.16 ( 1.98 - 8.74 ) | 4.16 ( 16.77 ) | 4.15 ( 2.23 ) | 2.05 ( 1.03 ) |
| Blood Test Abnormal | 7 | 4.19 ( 1.99 - 8.79 ) | 4.18 ( 16.92 ) | 4.18 ( 2.25 ) | 2.06 ( 1.04 ) |
| Laboratory Test Abnormal | 7 | 2.64 ( 1.26 - 5.55 ) | 2.64 ( 7.14 ) | 2.64 ( 1.42 ) | 1.4 ( 0.38 ) |
| Limb Injury | 7 | 2.33 ( 1.11 - 4.9 ) | 2.33 ( 5.32 ) | 2.33 ( 1.25 ) | 1.22 ( 0.2 ) |
| Leukaemia Recurrent | 7 | 64.31 ( 30.39 - 136.12 ) | 64.24 ( 425.97 ) | 62.81 ( 33.54 ) | 5.97 ( 4.94 ) |
| Pulmonary Thrombosis | 7 | 6.49 ( 3.09 - 13.62 ) | 6.48 ( 32.37 ) | 6.47 ( 3.48 ) | 2.69 ( 1.67 ) |
| Product Administered To Patient Of Inappropriate Age | 7 | 7.8 ( 3.71 - 16.38 ) | 7.79 ( 41.32 ) | 7.77 ( 4.18 ) | 2.96 ( 1.94 ) |
| Incorrect Route Of Product Administration | 7 | 2.7 ( 1.29 - 5.67 ) | 2.7 ( 7.49 ) | 2.7 ( 1.45 ) | 1.43 ( 0.41 ) |
| Oral Pain | 6 | 3.26 ( 1.46 - 7.25 ) | 3.25 ( 9.36 ) | 3.25 ( 1.66 ) | 1.7 ( 0.61 ) |
| Pneumonia Bacterial | 6 | 5.07 ( 2.28 - 11.31 ) | 5.07 ( 19.57 ) | 5.06 ( 2.59 ) | 2.34 ( 1.25 ) |
| Full Blood Count Decreased | 6 | 2.66 ( 1.19 - 5.92 ) | 2.65 ( 6.18 ) | 2.65 ( 1.36 ) | 1.41 ( 0.32 ) |
| Glaucoma | 6 | 3.83 ( 1.72 - 8.54 ) | 3.83 ( 12.53 ) | 3.83 ( 1.96 ) | 1.94 ( 0.84 ) |
| Blood Immunoglobulin G Decreased | 6 | 16.19 ( 7.25 - 36.13 ) | 16.17 ( 84.92 ) | 16.08 ( 8.22 ) | 4.01 ( 2.91 ) |
| Joint Stiffness | 6 | 2.64 ( 1.18 - 5.88 ) | 2.64 ( 6.1 ) | 2.64 ( 1.35 ) | 1.4 ( 0.31 ) |
| Staphylococcal Infection | 6 | 2.69 ( 1.21 - 5.98 ) | 2.68 ( 6.34 ) | 2.68 ( 1.37 ) | 1.42 ( 0.33 ) |
| Pulmonary Mass | 6 | 3.93 ( 1.76 - 8.76 ) | 3.93 ( 13.09 ) | 3.93 ( 2.01 ) | 1.97 ( 0.88 ) |
| Skin Atrophy | 6 | 11.6 ( 5.2 - 25.88 ) | 11.59 ( 57.83 ) | 11.55 ( 5.9 ) | 3.53 ( 2.44 ) |
| Pericardial Effusion | 6 | 3.15 ( 1.41 - 7.01 ) | 3.14 ( 8.77 ) | 3.14 ( 1.61 ) | 1.65 ( 0.56 ) |
| Pneumothorax | 5 | 3.5 ( 1.46 - 8.42 ) | 3.5 ( 8.91 ) | 3.5 ( 1.68 ) | 1.81 ( 0.63 ) |
| Faeces Soft | 5 | 4.53 ( 1.89 - 10.91 ) | 4.53 ( 13.74 ) | 4.53 ( 2.17 ) | 2.18 ( 1 ) |
| Spinal Pain | 5 | 3.84 ( 1.59 - 9.22 ) | 3.83 ( 10.46 ) | 3.83 ( 1.84 ) | 1.94 ( 0.76 ) |
| Skin Ulcer | 5 | 2.42 ( 1 - 5.81 ) | 2.41 ( 4.14 ) | 2.41 ( 1.16 ) | 1.27 ( 0.09 ) |
| Pulmonary Function Test Decreased | 5 | 15.12 ( 6.28 - 36.44 ) | 15.11 ( 65.54 ) | 15.04 ( 7.2 ) | 3.91 ( 2.73 ) |
| Hepatic Failure | 5 | 2.64 ( 1.1 - 6.35 ) | 2.64 ( 5.09 ) | 2.64 ( 1.27 ) | 1.4 ( 0.22 ) |
| Transfusion | 5 | 6.07 ( 2.52 - 14.61 ) | 6.07 ( 21.12 ) | 6.06 ( 2.91 ) | 2.6 ( 1.42 ) |
| Upper-Airway Cough Syndrome | 5 | 5.78 ( 2.4 - 13.91 ) | 5.78 ( 19.72 ) | 5.77 ( 2.77 ) | 2.53 ( 1.35 ) |
| Hepatic Enzyme Abnormal | 5 | 11.29 ( 4.69 - 27.17 ) | 11.28 ( 46.64 ) | 11.23 ( 5.39 ) | 3.49 ( 2.31 ) |
| Muscle Atrophy | 5 | 4.67 ( 1.94 - 11.22 ) | 4.66 ( 14.36 ) | 4.66 ( 2.23 ) | 2.22 ( 1.04 ) |
| Eating Disorder | 5 | 2.61 ( 1.09 - 6.28 ) | 2.61 ( 4.96 ) | 2.61 ( 1.25 ) | 1.38 ( 0.2 ) |
| Eye Infection | 5 | 4.07 ( 1.69 - 9.79 ) | 4.07 ( 11.55 ) | 4.06 ( 1.95 ) | 2.02 ( 0.84 ) |
| Nail Disorder | 5 | 5.8 ( 2.41 - 13.96 ) | 5.8 ( 19.81 ) | 5.79 ( 2.78 ) | 2.53 ( 1.35 ) |
| Eye Discharge | 5 | 4.89 ( 2.03 - 11.77 ) | 4.89 ( 15.44 ) | 4.88 ( 2.34 ) | 2.29 ( 1.11 ) |
| Liver Function Test Abnormal | 5 | 4.2 ( 1.75 - 10.11 ) | 4.2 ( 12.18 ) | 4.2 ( 2.01 ) | 2.07 ( 0.89 ) |
| Dental Caries | 5 | 6.53 ( 2.71 - 15.7 ) | 6.52 ( 23.32 ) | 6.51 ( 3.12 ) | 2.7 ( 1.52 ) |
| Photophobia | 5 | 2.9 ( 1.21 - 6.98 ) | 2.9 ( 6.22 ) | 2.9 ( 1.39 ) | 1.54 ( 0.36 ) |
| Blood Sodium Decreased | 5 | 3.29 ( 1.37 - 7.91 ) | 3.29 ( 7.94 ) | 3.28 ( 1.58 ) | 1.72 ( 0.54 ) |
| Respiratory Syncytial Virus Infection | 5 | 4.06 ( 1.69 - 9.76 ) | 4.05 ( 11.49 ) | 4.05 ( 1.94 ) | 2.02 ( 0.84 ) |
| Joint Injury | 5 | 2.39 ( 0.99 - 5.75 ) | 2.39 ( 4.04 ) | 2.39 ( 1.15 ) | 1.26 ( 0.08 ) |
| Lip Pain | 4 | 18.07 ( 6.76 - 48.31 ) | 18.06 ( 64.04 ) | 17.95 ( 7.88 ) | 4.17 ( 2.87 ) |
| Device Related Infection | 4 | 3.9 ( 1.46 - 10.41 ) | 3.9 ( 8.62 ) | 3.9 ( 1.72 ) | 1.96 ( 0.67 ) |
| Skin Laceration | 4 | 2.76 ( 1.03 - 7.36 ) | 2.76 ( 4.48 ) | 2.76 ( 1.21 ) | 1.46 ( 0.17 ) |
| White Blood Cell Count Abnormal | 4 | 5.8 ( 2.17 - 15.48 ) | 5.8 ( 15.85 ) | 5.79 ( 2.55 ) | 2.53 ( 1.24 ) |
| Platelet Count Abnormal | 4 | 6.1 ( 2.29 - 16.28 ) | 6.1 ( 17.01 ) | 6.09 ( 2.68 ) | 2.61 ( 1.31 ) |
| Upper Limb Fracture | 4 | 2.57 ( 0.97 - 6.87 ) | 2.57 ( 3.85 ) | 2.57 ( 1.13 ) | 1.36 ( 0.07 ) |
| Oral Mucosal Blistering | 4 | 7.99 ( 2.99 - 21.33 ) | 7.99 ( 24.38 ) | 7.97 ( 3.5 ) | 2.99 ( 1.7 ) |
| Cataract Operation | 4 | 9.86 ( 3.69 - 26.34 ) | 9.86 ( 31.73 ) | 9.83 ( 4.32 ) | 3.3 ( 2 ) |
| Rhinovirus Infection | 4 | 7.52 ( 2.82 - 20.07 ) | 7.51 ( 22.53 ) | 7.5 ( 3.3 ) | 2.91 ( 1.61 ) |
| Haemoglobin Abnormal | 4 | 6.29 ( 2.36 - 16.79 ) | 6.29 ( 17.76 ) | 6.28 ( 2.76 ) | 2.65 ( 1.36 ) |
| Renal Function Test Abnormal | 4 | 8.16 ( 3.06 - 21.77 ) | 8.15 ( 25.02 ) | 8.13 ( 3.58 ) | 3.02 ( 1.73 ) |
| Respiratory Tract Congestion | 4 | 2.95 ( 1.1 - 7.86 ) | 2.95 ( 5.13 ) | 2.94 ( 1.3 ) | 1.56 ( 0.27 ) |
| Ulcer | 4 | 3.01 ( 1.13 - 8.02 ) | 3.01 ( 5.35 ) | 3 ( 1.32 ) | 1.59 ( 0.3 ) |
| Fluid Intake Reduced | 4 | 8.83 ( 3.31 - 23.56 ) | 8.82 ( 27.65 ) | 8.8 ( 3.87 ) | 3.14 ( 1.84 ) |
| Squamous Cell Carcinoma | 4 | 5.25 ( 1.97 - 14 ) | 5.24 ( 13.71 ) | 5.24 ( 2.3 ) | 2.39 ( 1.1 ) |
| Impaired Work Ability | 4 | 2.95 ( 1.11 - 7.87 ) | 2.95 ( 5.15 ) | 2.95 ( 1.3 ) | 1.56 ( 0.27 ) |
| Pneumonia Fungal | 4 | 7.1 ( 2.66 - 18.94 ) | 7.09 ( 20.89 ) | 7.08 ( 3.11 ) | 2.82 ( 1.53 ) |
| Oral Disorder | 4 | 6.99 ( 2.62 - 18.65 ) | 6.98 ( 20.46 ) | 6.97 ( 3.06 ) | 2.8 ( 1.51 ) |
| Blood Glucose Fluctuation | 3 | 4.31 ( 1.39 - 13.37 ) | 4.31 ( 7.6 ) | 4.3 ( 1.67 ) | 2.1 ( 0.66 ) |
| Lip Dry | 3 | 2.97 ( 0.96 - 9.21 ) | 2.97 ( 3.91 ) | 2.96 ( 1.15 ) | 1.57 ( 0.12 ) |
| Thrombotic Microangiopathy | 3 | 3.01 ( 0.97 - 9.35 ) | 3.01 ( 4.03 ) | 3.01 ( 1.17 ) | 1.59 ( 0.15 ) |
| Oesophageal Stenosis | 3 | 13.29 ( 4.27 - 41.33 ) | 13.28 ( 33.92 ) | 13.23 ( 5.12 ) | 3.73 ( 2.28 ) |
| Oral Discomfort | 3 | 2.9 ( 0.93 - 8.99 ) | 2.89 ( 3.72 ) | 2.89 ( 1.12 ) | 1.53 ( 0.09 ) |
| Blood Magnesium Decreased | 3 | 3.56 ( 1.15 - 11.05 ) | 3.56 ( 5.52 ) | 3.56 ( 1.38 ) | 1.83 ( 0.39 ) |
| Immunosuppressant Drug Level Increased | 3 | 8.43 ( 2.71 - 26.2 ) | 8.43 ( 19.58 ) | 8.41 ( 3.26 ) | 3.07 ( 1.63 ) |
| Gastrointestinal Inflammation | 3 | 3.85 ( 1.24 - 11.94 ) | 3.85 ( 6.31 ) | 3.84 ( 1.49 ) | 1.94 ( 0.5 ) |
| Renal Pain | 3 | 3.22 ( 1.04 - 10.01 ) | 3.22 ( 4.59 ) | 3.22 ( 1.25 ) | 1.69 ( 0.24 ) |
| Blood Blister | 3 | 13.12 ( 4.22 - 40.81 ) | 13.12 ( 33.43 ) | 13.06 ( 5.05 ) | 3.71 ( 2.26 ) |
| Squamous Cell Carcinoma Of Skin | 3 | 4.79 ( 1.54 - 14.88 ) | 4.79 ( 8.98 ) | 4.78 ( 1.85 ) | 2.26 ( 0.81 ) |
| Blood Cholesterol Abnormal | 3 | 6.95 ( 2.24 - 21.58 ) | 6.95 ( 15.23 ) | 6.93 ( 2.68 ) | 2.79 ( 1.35 ) |
| Central Venous Catheterisation | 3 | 10.89 ( 3.5 - 33.85 ) | 10.88 ( 26.82 ) | 10.84 ( 4.2 ) | 3.44 ( 1.99 ) |
| Leukaemia | 3 | 2.76 ( 0.89 - 8.57 ) | 2.76 ( 3.37 ) | 2.76 ( 1.07 ) | 1.46 ( 0.02 ) |
| Acute Myeloid Leukaemia Recurrent | 3 | 10.53 ( 3.39 - 32.74 ) | 10.53 ( 25.77 ) | 10.49 ( 4.06 ) | 3.39 ( 1.94 ) |
| Impatience | 2 | 19.11 ( 4.76 - 76.81 ) | 19.11 ( 34.09 ) | 18.98 ( 5.93 ) | 4.25 ( 2.57 ) |
| Chapped Lips | 2 | 6.44 ( 1.61 - 25.79 ) | 6.44 ( 9.16 ) | 6.42 ( 2.01 ) | 2.68 ( 1.01 ) |
| Blister Infected | 2 | 28.77 ( 7.14 - 115.89 ) | 28.76 ( 53.04 ) | 28.48 ( 8.88 ) | 4.83 ( 3.15 ) |
| Gastrointestinal Tube Insertion | 2 | 11.3 ( 2.82 - 45.31 ) | 11.29 ( 18.69 ) | 11.25 ( 3.52 ) | 3.49 ( 1.82 ) |
| Blood Iron Increased | 2 | 13.1 ( 3.27 - 52.57 ) | 13.1 ( 22.24 ) | 13.04 ( 4.08 ) | 3.7 ( 2.03 ) |
| Oral Surgery | 2 | 8.65 ( 2.16 - 34.68 ) | 8.65 ( 13.49 ) | 8.63 ( 2.7 ) | 3.11 ( 1.44 ) |
| Oesophageal Dilatation | 2 | 48.96 ( 12.09 - 198.2 ) | 48.94 ( 92.31 ) | 48.12 ( 14.93 ) | 5.59 ( 3.9 ) |
| Parainfluenzae Virus Infection | 2 | 10.75 ( 2.68 - 43.12 ) | 10.75 ( 17.62 ) | 10.71 ( 3.35 ) | 3.42 ( 1.75 ) |
| Obliterative Bronchiolitis | 2 | 22.97 ( 5.71 - 92.39 ) | 22.96 ( 41.67 ) | 22.78 ( 7.11 ) | 4.51 ( 2.83 ) |
| White Blood Cell Disorder | 2 | 7.85 ( 1.96 - 31.46 ) | 7.85 ( 11.92 ) | 7.83 ( 2.45 ) | 2.97 ( 1.3 ) |
| Lip And/Or Oral Cavity Cancer | 2 | 12.66 ( 3.15 - 50.78 ) | 12.65 ( 21.37 ) | 12.6 ( 3.94 ) | 3.66 ( 1.98 ) |
| Leg Amputation | 2 | 9.36 ( 2.34 - 37.54 ) | 9.36 ( 14.89 ) | 9.33 ( 2.92 ) | 3.22 ( 1.55 ) |
| Chronic Graft Versus Host Disease In Lung | 2 | 54.72 ( 13.5 - 221.83 ) | 54.7 ( 103.41 ) | 53.67 ( 16.64 ) | 5.75 ( 4.06 ) |
| Lip Squamous Cell Carcinoma | 2 | 132.89 ( 32.16 - 549.11 ) | 132.84 ( 249.81 ) | 126.85 ( 38.7 ) | 6.99 ( 5.27 ) |
| Liver Iron Concentration Increased | 2 | 328.32 ( 75.84 - 1421.4 ) | 328.21 ( 583.74 ) | 293.76 ( 86.19 ) | 8.2 ( 6.41 ) |
| Stem Cell Transplant | 2 | 13.16 ( 3.28 - 52.82 ) | 13.16 ( 22.37 ) | 13.1 ( 4.1 ) | 3.71 ( 2.04 ) |
| Biopsy | 2 | 31.71 ( 7.87 - 127.83 ) | 31.7 ( 58.8 ) | 31.36 ( 9.77 ) | 4.97 ( 3.29 ) |
| Product Used For Unknown Indication | 2 | 13.13 ( 3.27 - 52.69 ) | 13.13 ( 22.3 ) | 13.07 ( 4.09 ) | 3.71 ( 2.04 ) |
| Dacryostenosis Acquired | 2 | 10.53 ( 2.63 - 42.23 ) | 10.53 ( 17.18 ) | 10.49 ( 3.28 ) | 3.39 ( 1.72 ) |
| Immobile | 2 | 6.56 ( 1.64 - 26.27 ) | 6.56 ( 9.4 ) | 6.54 ( 2.05 ) | 2.71 ( 1.04 ) |
| Neoplasm Skin | 2 | 12.68 ( 3.16 - 50.89 ) | 12.68 ( 21.42 ) | 12.63 ( 3.95 ) | 3.66 ( 1.99 ) |
| Carbon Dioxide Increased | 2 | 18 ( 4.48 - 72.33 ) | 18 ( 31.9 ) | 17.89 ( 5.59 ) | 4.16 ( 2.49 ) |
| Tongue Neoplasm Malignant Stage Unspecified | 2 | 10.02 ( 2.5 - 40.18 ) | 10.02 ( 16.18 ) | 9.98 ( 3.12 ) | 3.32 ( 1.65 ) |
| Skin Hypertrophy | 2 | 8.44 ( 2.11 - 33.84 ) | 8.44 ( 13.08 ) | 8.42 ( 2.63 ) | 3.07 ( 1.4 ) |
| Bone Marrow Transplant | 2 | 12 ( 2.99 - 48.15 ) | 12 ( 20.08 ) | 11.95 ( 3.74 ) | 3.58 ( 1.91 ) |
| Ophthalmic Migraine | 2 | 13.65 ( 3.4 - 54.76 ) | 13.64 ( 23.32 ) | 13.58 ( 4.25 ) | 3.76 ( 2.09 ) |
| Neutrophil Count Abnormal | 2 | 7.05 ( 1.76 - 28.23 ) | 7.04 ( 10.35 ) | 7.03 ( 2.2 ) | 2.81 ( 1.14 ) |

Abbreviation: PT, preferred term; ROR, reporting odds ratio; PRR, proportional reporting ratio; EBGM, empirical Bayesian geometric mean; EBGM05, the lower limit of the 95% CI of EBGM; IC, information component; IC025, the lower limit of the 95% CI of the IC; CI, confidence interval.

Supplementary Table S4: Top 50 most frequent adverse events meeting the positive signal for belumosudil at the PT levels in males.

| PT | Case numbers | ROR(95%CI) | PRR(χ2) | EBGM(EBGM05) | IC(IC025) |
| --- | --- | --- | --- | --- | --- |
| Inappropriate Schedule Of Product Administration | 146 | 10.22 ( 8.64 - 12.07 ) | 9.74 ( 1144.95 ) | 9.69 ( 8.43 ) | 3.28 ( 3.03 ) |
| Product Use In Unapproved Indication | 123 | 8.3 ( 6.92 - 9.95 ) | 7.98 ( 751.78 ) | 7.95 ( 6.83 ) | 2.99 ( 2.73 ) |
| Fatigue | 88 | 2.74 ( 2.22 - 3.39 ) | 2.69 ( 94.14 ) | 2.68 ( 2.25 ) | 1.42 ( 1.11 ) |
| Product Dose Omission Issue | 69 | 2.4 ( 1.89 - 3.05 ) | 2.37 ( 55.11 ) | 2.37 ( 1.94 ) | 1.24 ( 0.89 ) |
| Condition Aggravated | 57 | 3.53 ( 2.72 - 4.59 ) | 3.48 ( 101.22 ) | 3.48 ( 2.79 ) | 1.8 ( 1.41 ) |
| Diarrhoea | 52 | 1.84 ( 1.4 - 2.43 ) | 1.83 ( 19.73 ) | 1.83 ( 1.45 ) | 0.87 ( 0.47 ) |
| Dyspnoea | 51 | 2.38 ( 1.8 - 3.13 ) | 2.35 ( 39.81 ) | 2.35 ( 1.86 ) | 1.23 ( 0.83 ) |
| Pneumonia | 49 | 3.28 ( 2.47 - 4.35 ) | 3.24 ( 76.28 ) | 3.24 ( 2.56 ) | 1.7 ( 1.28 ) |
| Covid-19 | 44 | 1.88 ( 1.39 - 2.53 ) | 1.86 ( 17.73 ) | 1.86 ( 1.45 ) | 0.9 ( 0.46 ) |
| Asthenia | 35 | 2.23 ( 1.6 - 3.11 ) | 2.22 ( 23.44 ) | 2.21 ( 1.67 ) | 1.15 ( 0.66 ) |
| Nausea | 35 | 1.63 ( 1.17 - 2.28 ) | 1.62 ( 8.46 ) | 1.62 ( 1.23 ) | 0.7 ( 0.22 ) |
| Rash | 34 | 1.86 ( 1.32 - 2.61 ) | 1.85 ( 13.3 ) | 1.85 ( 1.39 ) | 0.89 ( 0.39 ) |
| Cough | 31 | 2.41 ( 1.69 - 3.44 ) | 2.4 ( 25.31 ) | 2.39 ( 1.78 ) | 1.26 ( 0.75 ) |
| Pruritus | 28 | 1.67 ( 1.15 - 2.42 ) | 1.66 ( 7.39 ) | 1.66 ( 1.22 ) | 0.73 ( 0.19 ) |
| Nasopharyngitis | 23 | 3.28 ( 2.18 - 4.95 ) | 3.27 ( 36.17 ) | 3.26 ( 2.31 ) | 1.71 ( 1.11 ) |
| Decreased Appetite | 21 | 1.92 ( 1.25 - 2.94 ) | 1.91 ( 9.1 ) | 1.91 ( 1.33 ) | 0.93 ( 0.31 ) |
| Muscle Spasms | 20 | 3.31 ( 2.13 - 5.15 ) | 3.3 ( 32.02 ) | 3.29 ( 2.28 ) | 1.72 ( 1.09 ) |
| Abdominal Discomfort | 19 | 3.12 ( 1.99 - 4.91 ) | 3.11 ( 27.21 ) | 3.11 ( 2.13 ) | 1.64 ( 0.99 ) |
| Blood Pressure Increased | 18 | 2.68 ( 1.68 - 4.26 ) | 2.67 ( 18.77 ) | 2.66 ( 1.81 ) | 1.41 ( 0.75 ) |
| Peripheral Swelling | 18 | 2.46 ( 1.55 - 3.92 ) | 2.46 ( 15.55 ) | 2.45 ( 1.66 ) | 1.29 ( 0.63 ) |
| Platelet Count Decreased | 18 | 3.13 ( 1.97 - 4.97 ) | 3.11 ( 25.83 ) | 3.11 ( 2.11 ) | 1.64 ( 0.97 ) |
| Influenza | 18 | 4.26 ( 2.68 - 6.77 ) | 4.24 ( 44.48 ) | 4.23 ( 2.87 ) | 2.08 ( 1.42 ) |
| Dry Eye | 17 | 7.98 ( 4.95 - 12.87 ) | 7.94 ( 102.78 ) | 7.91 ( 5.3 ) | 2.98 ( 2.3 ) |
| Infection | 16 | 2.63 ( 1.61 - 4.3 ) | 2.62 ( 16.04 ) | 2.62 ( 1.73 ) | 1.39 ( 0.69 ) |
| Disease Progression | 15 | 1.97 ( 1.18 - 3.27 ) | 1.96 ( 7.09 ) | 1.96 ( 1.28 ) | 0.97 ( 0.25 ) |
| Haemoglobin Decreased | 15 | 3.39 ( 2.04 - 5.64 ) | 3.38 ( 25.12 ) | 3.38 ( 2.21 ) | 1.75 ( 1.03 ) |
| Gastrointestinal Disorder | 12 | 3.15 ( 1.79 - 5.55 ) | 3.14 ( 17.49 ) | 3.14 ( 1.95 ) | 1.65 ( 0.85 ) |
| Dry Skin | 10 | 1.85 ( 0.99 - 3.44 ) | 1.85 ( 3.89 ) | 1.85 ( 1.1 ) | 0.89 ( 0.01 ) |
| Product Dose Omission In Error | 10 | 3.68 ( 1.98 - 6.86 ) | 3.67 ( 19.43 ) | 3.67 ( 2.18 ) | 1.87 ( 1 ) |
| Depressed Mood | 10 | 4.91 ( 2.64 - 9.15 ) | 4.9 ( 30.98 ) | 4.89 ( 2.91 ) | 2.29 ( 1.42 ) |
| White Blood Cell Count Decreased | 10 | 2.08 ( 1.12 - 3.87 ) | 2.08 ( 5.59 ) | 2.08 ( 1.23 ) | 1.05 ( 0.18 ) |
| Hepatic Enzyme Increased | 10 | 4.28 ( 2.3 - 7.97 ) | 4.27 ( 24.99 ) | 4.26 ( 2.53 ) | 2.09 ( 1.22 ) |
| Muscular Weakness | 10 | 2.33 ( 1.25 - 4.35 ) | 2.33 ( 7.59 ) | 2.33 ( 1.38 ) | 1.22 ( 0.35 ) |
| Lung Disorder | 10 | 4.73 ( 2.54 - 8.8 ) | 4.71 ( 29.21 ) | 4.71 ( 2.8 ) | 2.23 ( 1.36 ) |
| Blood Creatinine Increased | 9 | 2.52 ( 1.31 - 4.85 ) | 2.51 ( 8.2 ) | 2.51 ( 1.45 ) | 1.33 ( 0.41 ) |
| Dry Mouth | 9 | 4.03 ( 2.09 - 7.76 ) | 4.02 ( 20.4 ) | 4.01 ( 2.32 ) | 2.01 ( 1.09 ) |
| Thrombosis | 9 | 2.46 ( 1.28 - 4.74 ) | 2.46 ( 7.79 ) | 2.46 ( 1.42 ) | 1.3 ( 0.38 ) |
| Skin Tightness | 9 | 88.56 ( 45.34 - 172.99 ) | 88.28 ( 741.91 ) | 84.38 ( 48.19 ) | 6.4 ( 5.46 ) |
| Loss Of Personal Independence In Daily Activities | 8 | 2.43 ( 1.21 - 4.86 ) | 2.42 ( 6.68 ) | 2.42 ( 1.35 ) | 1.28 ( 0.31 ) |
| Bacterial Infection | 8 | 8 ( 3.99 - 16.04 ) | 7.98 ( 48.66 ) | 7.95 ( 4.44 ) | 2.99 ( 2.03 ) |
| Swelling | 8 | 2.67 ( 1.33 - 5.34 ) | 2.66 ( 8.31 ) | 2.66 ( 1.49 ) | 1.41 ( 0.45 ) |
| Stomatitis | 7 | 3.35 ( 1.59 - 7.03 ) | 3.34 ( 11.47 ) | 3.34 ( 1.79 ) | 1.74 ( 0.72 ) |
| Nasal Congestion | 7 | 2.76 ( 1.31 - 5.8 ) | 2.76 ( 7.84 ) | 2.75 ( 1.48 ) | 1.46 ( 0.44 ) |
| Cellulitis | 7 | 3.31 ( 1.58 - 6.96 ) | 3.31 ( 11.27 ) | 3.31 ( 1.78 ) | 1.72 ( 0.7 ) |
| Oedema | 7 | 3.94 ( 1.87 - 8.28 ) | 3.93 ( 15.28 ) | 3.93 ( 2.11 ) | 1.97 ( 0.95 ) |
| Cataract | 6 | 2.43 ( 1.09 - 5.41 ) | 2.42 ( 5.01 ) | 2.42 ( 1.24 ) | 1.28 ( 0.18 ) |
| Skin Discolouration | 6 | 3.78 ( 1.7 - 8.44 ) | 3.78 ( 12.24 ) | 3.77 ( 1.93 ) | 1.92 ( 0.82 ) |
| Bronchitis | 6 | 3.49 ( 1.56 - 7.78 ) | 3.48 ( 10.61 ) | 3.48 ( 1.78 ) | 1.8 ( 0.71 ) |
| Scleroderma | 6 | 77.56 ( 34.25 - 175.63 ) | 77.4 ( 434.62 ) | 74.38 ( 37.54 ) | 6.22 ( 5.1 ) |
| Renal Disorder | 6 | 2.61 ( 1.17 - 5.81 ) | 2.6 ( 5.93 ) | 2.6 ( 1.33 ) | 1.38 ( 0.29 ) |

Abbreviation: ROR, reporting odds ratio; PRR, proportional reporting ratio; EBGM, empirical Bayesian geometric mean; EBGM05, the lower limit of the 95% CI of EBGM; IC, information component; IC025, the lower limit of the 95% CI of the IC; CI, confidence interval; PT, preferred term.

Supplementary Table S5: Top 50 most frequent adverse events meeting the positive signal for belumosudil at the PT levels in females.

| PT | Case numbers | ROR(95%CI) | PRR(χ2) | EBGM(EBGM05) | IC(IC025) |
| --- | --- | --- | --- | --- | --- |
| Inappropriate Schedule Of Product Administration | 108 | 8.43 ( 6.95 - 10.22 ) | 8.13 ( 677.18 ) | 8.11 ( 6.91 ) | 3.02 ( 2.74 ) |
| Fatigue | 106 | 2.85 ( 2.34 - 3.46 ) | 2.77 ( 121.93 ) | 2.77 ( 2.36 ) | 1.47 ( 1.19 ) |
| Product Use In Unapproved Indication | 84 | 6.45 ( 5.19 - 8.01 ) | 6.28 ( 373.75 ) | 6.27 ( 5.22 ) | 2.65 ( 2.33 ) |
| Nausea | 80 | 2.25 ( 1.8 - 2.81 ) | 2.21 ( 53.58 ) | 2.21 ( 1.83 ) | 1.14 ( 0.82 ) |
| Diarrhoea | 52 | 1.68 ( 1.28 - 2.21 ) | 1.67 ( 14.04 ) | 1.67 ( 1.32 ) | 0.74 ( 0.34 ) |
| Condition Aggravated | 51 | 3.31 ( 2.51 - 4.36 ) | 3.26 ( 80.47 ) | 3.26 ( 2.59 ) | 1.71 ( 1.3 ) |
| Product Dose Omission Issue | 51 | 1.76 ( 1.33 - 2.32 ) | 1.75 ( 16.41 ) | 1.75 ( 1.38 ) | 0.8 ( 0.4 ) |
| Dyspnoea | 43 | 1.92 ( 1.42 - 2.6 ) | 1.91 ( 18.64 ) | 1.9 ( 1.48 ) | 0.93 ( 0.49 ) |
| Asthenia | 37 | 2.49 ( 1.8 - 3.44 ) | 2.47 ( 32.42 ) | 2.47 ( 1.88 ) | 1.3 ( 0.83 ) |
| Decreased Appetite | 29 | 2.84 ( 1.97 - 4.09 ) | 2.82 ( 34.15 ) | 2.82 ( 2.07 ) | 1.49 ( 0.96 ) |
| Cough | 28 | 1.97 ( 1.36 - 2.86 ) | 1.96 ( 13.24 ) | 1.96 ( 1.44 ) | 0.97 ( 0.43 ) |
| Pneumonia | 26 | 2.1 ( 1.43 - 3.09 ) | 2.09 ( 14.8 ) | 2.09 ( 1.51 ) | 1.06 ( 0.5 ) |
| Muscle Spasms | 25 | 3.35 ( 2.26 - 4.96 ) | 3.32 ( 40.7 ) | 3.32 ( 2.39 ) | 1.73 ( 1.16 ) |
| Hepatic Enzyme Increased | 22 | 5.83 ( 3.83 - 8.87 ) | 5.79 ( 87.18 ) | 5.78 ( 4.07 ) | 2.53 ( 1.93 ) |
| Abdominal Pain Upper | 20 | 2.14 ( 1.38 - 3.32 ) | 2.13 ( 12.01 ) | 2.13 ( 1.47 ) | 1.09 ( 0.46 ) |
| Dry Eye | 20 | 6.06 ( 3.9 - 9.4 ) | 6.02 ( 83.62 ) | 6.01 ( 4.16 ) | 2.59 ( 1.95 ) |
| Constipation | 19 | 1.94 ( 1.24 - 3.05 ) | 1.93 ( 8.6 ) | 1.93 ( 1.33 ) | 0.95 ( 0.3 ) |
| Myalgia | 17 | 2.74 ( 1.7 - 4.42 ) | 2.73 ( 18.67 ) | 2.73 ( 1.83 ) | 1.45 ( 0.77 ) |
| Abdominal Discomfort | 17 | 1.9 ( 1.18 - 3.06 ) | 1.89 ( 7.2 ) | 1.89 ( 1.27 ) | 0.92 ( 0.24 ) |
| Depressed Mood | 14 | 5.94 ( 3.51 - 10.05 ) | 5.91 ( 57.11 ) | 5.9 ( 3.8 ) | 2.56 ( 1.81 ) |
| Blood Pressure Increased | 13 | 1.97 ( 1.14 - 3.4 ) | 1.97 ( 6.2 ) | 1.97 ( 1.25 ) | 0.98 ( 0.2 ) |
| Dry Mouth | 13 | 3.72 ( 2.16 - 6.42 ) | 3.71 ( 25.72 ) | 3.7 ( 2.35 ) | 1.89 ( 1.12 ) |
| Haemoglobin Decreased | 11 | 3.1 ( 1.71 - 5.6 ) | 3.09 ( 15.56 ) | 3.09 ( 1.88 ) | 1.63 ( 0.79 ) |
| Graft Versus Host Disease In Skin | 11 | 157.12 ( 85.68 - 288.13 ) | 156.48 ( 1620.16 ) | 149.23 ( 89.84 ) | 7.22 ( 6.37 ) |
| General Physical Health Deterioration | 11 | 2.22 ( 1.23 - 4.01 ) | 2.21 ( 7.31 ) | 2.21 ( 1.35 ) | 1.14 ( 0.31 ) |
| Dyspepsia | 10 | 2.3 ( 1.24 - 4.28 ) | 2.29 ( 7.31 ) | 2.29 ( 1.36 ) | 1.2 ( 0.33 ) |
| Neuropathy Peripheral | 10 | 2.46 ( 1.32 - 4.57 ) | 2.45 ( 8.59 ) | 2.45 ( 1.46 ) | 1.29 ( 0.42 ) |
| Bone Pain | 10 | 3.86 ( 2.07 - 7.19 ) | 3.85 ( 21.09 ) | 3.85 ( 2.29 ) | 1.94 ( 1.07 ) |
| Emotional Disorder | 10 | 11.42 ( 6.13 - 21.27 ) | 11.38 ( 94.36 ) | 11.34 ( 6.74 ) | 3.5 ( 2.63 ) |
| Loss Of Personal Independence In Daily Activities | 10 | 2.66 ( 1.43 - 4.95 ) | 2.65 ( 10.29 ) | 2.65 ( 1.58 ) | 1.41 ( 0.53 ) |
| Platelet Count Decreased | 9 | 2.06 ( 1.07 - 3.96 ) | 2.05 ( 4.86 ) | 2.05 ( 1.19 ) | 1.04 ( 0.12 ) |
| Dysphagia | 9 | 2.69 ( 1.4 - 5.18 ) | 2.69 ( 9.52 ) | 2.68 ( 1.55 ) | 1.42 ( 0.51 ) |
| Blood Cholesterol Increased | 9 | 3.8 ( 1.97 - 7.32 ) | 3.79 ( 18.49 ) | 3.79 ( 2.19 ) | 1.92 ( 1.01 ) |
| Stomatitis | 8 | 2.35 ( 1.17 - 4.7 ) | 2.34 ( 6.16 ) | 2.34 ( 1.31 ) | 1.23 ( 0.26 ) |
| Skin Disorder | 8 | 4.64 ( 2.31 - 9.28 ) | 4.62 ( 22.71 ) | 4.62 ( 2.58 ) | 2.21 ( 1.24 ) |
| Viral Infection | 8 | 5.45 ( 2.72 - 10.91 ) | 5.44 ( 28.92 ) | 5.43 ( 3.04 ) | 2.44 ( 1.48 ) |
| Gastroenteritis Viral | 8 | 8.14 ( 4.06 - 16.31 ) | 8.12 ( 49.82 ) | 8.1 ( 4.53 ) | 3.02 ( 2.05 ) |
| Cataract | 7 | 2.28 ( 1.09 - 4.8 ) | 2.28 ( 5.04 ) | 2.28 ( 1.23 ) | 1.19 ( 0.17 ) |
| Lung Disorder | 7 | 3.3 ( 1.57 - 6.93 ) | 3.29 ( 11.17 ) | 3.29 ( 1.77 ) | 1.72 ( 0.7 ) |
| Thrombosis | 7 | 2.4 ( 1.14 - 5.04 ) | 2.4 ( 5.7 ) | 2.39 ( 1.29 ) | 1.26 ( 0.24 ) |
| Product Dose Omission In Error | 7 | 2.28 ( 1.09 - 4.79 ) | 2.28 ( 5.02 ) | 2.28 ( 1.22 ) | 1.19 ( 0.17 ) |
| White Blood Cell Count Increased | 6 | 5.17 ( 2.32 - 11.54 ) | 5.17 ( 20.13 ) | 5.16 ( 2.64 ) | 2.37 ( 1.27 ) |
| Oedema | 6 | 2.76 ( 1.24 - 6.15 ) | 2.76 ( 6.71 ) | 2.75 ( 1.41 ) | 1.46 ( 0.37 ) |
| Pulmonary Thrombosis | 6 | 11.43 ( 5.12 - 25.49 ) | 11.4 ( 56.76 ) | 11.37 ( 5.81 ) | 3.51 ( 2.41 ) |
| Skin Atrophy | 6 | 23.5 ( 10.52 - 52.51 ) | 23.45 ( 128.02 ) | 23.28 ( 11.88 ) | 4.54 ( 3.44 ) |
| Blood Potassium Decreased | 5 | 3.67 ( 1.52 - 8.82 ) | 3.66 ( 9.67 ) | 3.66 ( 1.76 ) | 1.87 ( 0.69 ) |
| Therapeutic Response Unexpected | 5 | 3.49 ( 1.45 - 8.4 ) | 3.49 ( 8.86 ) | 3.48 ( 1.67 ) | 1.8 ( 0.62 ) |
| Limb Discomfort | 5 | 2.77 ( 1.15 - 6.67 ) | 2.77 ( 5.66 ) | 2.77 ( 1.33 ) | 1.47 ( 0.29 ) |
| Flatulence | 5 | 2.29 ( 0.95 - 5.52 ) | 2.29 ( 3.64 ) | 2.29 ( 1.1 ) | 1.2 ( 0.02 ) |
| Renal disorder | 5 | 2.95 ( 1.23 - 7.09 ) | 2.94 ( 6.42 ) | 2.94 ( 1.41 ) | 1.56 ( 0.38 ) |

Abbreviation: ROR, reporting odds ratio; PRR, proportional reporting ratio; EBGM, empirical Bayesian geometric mean; EBGM05, the lower limit of the 95% CI of EBGM; IC, information component; IC025, the lower limit of the 95% CI of the IC; CI, confidence interval; PT, preferred term.

Supplementary Table S6: All adverse events meeting the positive signal for belumosudil at the PT levels in patients aged < 18 years.

| PT | Case numbers | ROR(95%CI) | PRR(χ2) | EBGM(EBGM05) | IC(IC025) |
| --- | --- | --- | --- | --- | --- |
| Product Use In Unapproved Indication | 10 | 6.53 ( 3.44 - 12.38 ) | 6.2 ( 43.93 ) | 6.19 ( 3.62 ) | 2.63 ( 1.73 ) |
| Inappropriate Schedule Of Product Administration | 8 | 8.61 ( 4.23 - 17.52 ) | 8.24 ( 51.07 ) | 8.22 ( 4.54 ) | 3.04 ( 2.05 ) |
| Product Administered To Patient Of Inappropriate Age | 7 | 23.78 ( 11.13 - 50.82 ) | 22.82 ( 145.45 ) | 22.69 ( 12.02 ) | 4.5 ( 3.46 ) |
| Nausea | 4 | 3.8 ( 1.41 - 10.24 ) | 3.73 ( 8.03 ) | 3.73 ( 1.62 ) | 1.9 ( 0.59 ) |
| Infection | 3 | 9.07 ( 2.89 - 28.44 ) | 8.92 ( 21.09 ) | 8.9 ( 3.42 ) | 3.15 ( 1.69 ) |
| Asthenia | 3 | 10.06 ( 3.21 - 31.56 ) | 9.89 ( 23.97 ) | 9.87 ( 3.79 ) | 3.3 ( 1.84 ) |
| Dyspnoea | 3 | 4.75 ( 1.52 - 14.89 ) | 4.68 ( 8.71 ) | 4.68 ( 1.8 ) | 2.23 ( 0.76 ) |

Abbreviation: ROR, reporting odds ratio; PRR, proportional reporting ratio; EBGM, empirical Bayesian geometric mean; EBGM05, the lower limit of the 95% CI of EBGM; IC, information component; IC025, the lower limit of the 95% CI of the IC; CI, confidence interval; PT, preferred term.

Supplementary Table S7: Top 50 most frequent adverse events meeting the positive signal for belumosudil at the PT levels in patients aged 18-65 years.

| PT | Case numbers | ROR(95%CI) | PRR(χ2) | EBGM(EBGM05) | IC(IC025) |
| --- | --- | --- | --- | --- | --- |
| Inappropriate Schedule of Product Administration | 164 | 14.95 ( 12.75 - 17.53 ) | 13.95 ( 1970.24 ) | 13.87 ( 12.14 ) | 3.79 ( 3.56 ) |
| Product Use in Unapproved Indication | 133 | 10.75 ( 9.02 - 12.81 ) | 10.18 ( 1103.08 ) | 10.14 ( 8.76 ) | 3.34 ( 3.09 ) |
| Fatigue | 72 | 2.46 ( 1.94 - 3.11 ) | 2.41 ( 60.27 ) | 2.41 ( 1.98 ) | 1.27 ( 0.93 ) |
| Nausea | 46 | 1.59 ( 1.19 - 2.13 ) | 1.58 ( 9.86 ) | 1.58 ( 1.24 ) | 0.66 ( 0.23 ) |
| Asthenia | 33 | 2.86 ( 2.03 - 4.03 ) | 2.83 ( 39.23 ) | 2.83 ( 2.12 ) | 1.5 ( 1 ) |
| Pneumonia | 32 | 3.38 ( 2.39 - 4.8 ) | 3.35 ( 52.92 ) | 3.35 ( 2.5 ) | 1.74 ( 1.24 ) |
| Condition Aggravated | 31 | 1.97 ( 1.38 - 2.81 ) | 1.96 ( 14.63 ) | 1.96 ( 1.45 ) | 0.97 ( 0.46 ) |
| Dyspnoea | 31 | 1.76 ( 1.23 - 2.51 ) | 1.75 ( 9.98 ) | 1.75 ( 1.3 ) | 0.8 ( 0.29 ) |
| Cough | 24 | 2.24 ( 1.5 - 3.35 ) | 2.23 ( 16.35 ) | 2.23 ( 1.59 ) | 1.16 ( 0.58 ) |
| Muscle Spasms | 22 | 3.71 ( 2.44 - 5.65 ) | 3.69 ( 43.12 ) | 3.68 ( 2.59 ) | 1.88 ( 1.28 ) |
| Nasopharyngitis | 20 | 2.3 ( 1.48 - 3.57 ) | 2.29 ( 14.53 ) | 2.29 ( 1.58 ) | 1.19 ( 0.56 ) |
| Decreased Appetite | 17 | 2.32 ( 1.44 - 3.74 ) | 2.31 ( 12.68 ) | 2.31 ( 1.55 ) | 1.21 ( 0.52 ) |
| Weight Decreased | 15 | 1.66 ( 1 - 2.76 ) | 1.66 ( 3.94 ) | 1.66 ( 1.08 ) | 0.73 ( 0.01 ) |
| Haemoglobin Decreased | 15 | 5.23 ( 3.15 - 8.7 ) | 5.2 ( 50.9 ) | 5.2 ( 3.4 ) | 2.38 ( 1.65 ) |
| Platelet Count Decreased | 15 | 4.56 ( 2.74 - 7.57 ) | 4.53 ( 41.28 ) | 4.53 ( 2.96 ) | 2.18 ( 1.45 ) |
| Fall | 15 | 2.18 ( 1.31 - 3.62 ) | 2.17 ( 9.49 ) | 2.17 ( 1.42 ) | 1.12 ( 0.39 ) |
| Influenza | 15 | 3.19 ( 1.92 - 5.3 ) | 3.18 ( 22.38 ) | 3.17 ( 2.07 ) | 1.67 ( 0.94 ) |
| Infection | 14 | 2.42 ( 1.43 - 4.09 ) | 2.41 ( 11.59 ) | 2.41 ( 1.55 ) | 1.27 ( 0.52 ) |
| Dry Eye | 14 | 5.37 ( 3.17 - 9.09 ) | 5.34 ( 49.39 ) | 5.34 ( 3.44 ) | 2.42 ( 1.67 ) |
| Abdominal Pain Upper | 14 | 1.89 ( 1.12 - 3.2 ) | 1.89 ( 5.85 ) | 1.89 ( 1.21 ) | 0.92 ( 0.17 ) |
| Abdominal Discomfort | 14 | 2.08 ( 1.23 - 3.52 ) | 2.07 ( 7.77 ) | 2.07 ( 1.33 ) | 1.05 ( 0.3 ) |
| Depressed Mood | 14 | 6.72 ( 3.97 - 11.37 ) | 6.68 ( 67.55 ) | 6.67 ( 4.29 ) | 2.74 ( 1.99 ) |
| Vision Blurred | 12 | 2.56 ( 1.45 - 4.52 ) | 2.55 ( 11.35 ) | 2.55 ( 1.59 ) | 1.35 ( 0.55 ) |
| Emotional Disorder | 11 | 14.43 ( 7.97 - 26.15 ) | 14.37 ( 136.09 ) | 14.29 ( 8.69 ) | 3.84 ( 3 ) |
| Myalgia | 11 | 2 ( 1.1 - 3.61 ) | 1.99 ( 5.44 ) | 1.99 ( 1.21 ) | 0.99 ( 0.16 ) |
| Product Dose Omission in Error | 10 | 3.55 ( 1.9 - 6.6 ) | 3.53 ( 18.17 ) | 3.53 ( 2.1 ) | 1.82 ( 0.95 ) |
| Hepatic Enzyme Increased | 10 | 2.92 ( 1.57 - 5.43 ) | 2.91 ( 12.54 ) | 2.91 ( 1.73 ) | 1.54 ( 0.67 ) |
| General Physical Health Deterioration | 10 | 2.56 ( 1.37 - 4.76 ) | 2.55 ( 9.41 ) | 2.55 ( 1.51 ) | 1.35 ( 0.48 ) |
| Neuropathy Peripheral | 9 | 2.7 ( 1.4 - 5.2 ) | 2.69 ( 9.59 ) | 2.69 ( 1.56 ) | 1.43 ( 0.51 ) |
| Lung Disorder | 9 | 5.42 ( 2.81 - 10.44 ) | 5.4 ( 32.23 ) | 5.39 ( 3.12 ) | 2.43 ( 1.52 ) |
| Cataract | 8 | 6.62 ( 3.3 - 13.26 ) | 6.6 ( 37.92 ) | 6.58 ( 3.68 ) | 2.72 ( 1.75 ) |
| Dry Mouth | 7 | 2.61 ( 1.24 - 5.48 ) | 2.6 ( 6.91 ) | 2.6 ( 1.4 ) | 1.38 ( 0.36 ) |
| Loss of Personal Independence in Daily Activities | 7 | 2.15 ( 1.02 - 4.51 ) | 2.14 ( 4.26 ) | 2.14 ( 1.15 ) | 1.1 ( 0.08 ) |
| Viral Infection | 7 | 6.43 ( 3.06 - 13.52 ) | 6.42 ( 31.94 ) | 6.4 ( 3.44 ) | 2.68 ( 1.66 ) |
| Respiratory Failure | 6 | 3.11 ( 1.4 - 6.94 ) | 3.11 ( 8.56 ) | 3.1 ( 1.59 ) | 1.63 ( 0.54 ) |
| Blood Potassium Decreased | 5 | 5.46 ( 2.27 - 13.14 ) | 5.45 ( 18.13 ) | 5.44 ( 2.61 ) | 2.44 ( 1.26 ) |
| Atrial Fibrillation | 5 | 3.39 ( 1.41 - 8.16 ) | 3.38 ( 8.39 ) | 3.38 ( 1.62 ) | 1.76 ( 0.58 ) |
| Scleroderma | 5 | 48.6 ( 20.04 - 117.86 ) | 48.49 ( 228.13 ) | 47.59 ( 22.67 ) | 5.57 ( 4.38 ) |
| Thrombosis | 5 | 2.37 ( 0.99 - 5.71 ) | 2.37 ( 3.96 ) | 2.37 ( 1.14 ) | 1.24 ( 0.06 ) |
| Limb Discomfort | 5 | 3.62 ( 1.5 - 8.71 ) | 3.62 ( 9.45 ) | 3.61 ( 1.73 ) | 1.85 ( 0.67 ) |
| Bone Pain | 5 | 2.67 ( 1.11 - 6.42 ) | 2.67 ( 5.21 ) | 2.66 ( 1.28 ) | 1.41 ( 0.23 ) |
| Cellulitis | 5 | 3.04 ( 1.26 - 7.31 ) | 3.03 ( 6.81 ) | 3.03 ( 1.45 ) | 1.6 ( 0.42 ) |
| Epistaxis | 5 | 2.86 ( 1.19 - 6.87 ) | 2.85 ( 6.01 ) | 2.85 ( 1.37 ) | 1.51 ( 0.33 ) |
| Pulmonary Thrombosis | 5 | 14.88 ( 6.17 - 35.89 ) | 14.85 ( 64.23 ) | 14.77 ( 7.07 ) | 3.88 ( 2.7 ) |
| Aspartate Aminotransferase Increased | 4 | 2.53 ( 0.95 - 6.75 ) | 2.53 ( 3.69 ) | 2.53 ( 1.11 ) | 1.34 ( 0.04 ) |
| Bacterial Infection | 4 | 5.88 ( 2.2 - 15.69 ) | 5.87 ( 16.12 ) | 5.86 ( 2.58 ) | 2.55 ( 1.26 ) |
| Graft Versus Host Disease in Lung | 4 | 199.75 ( 72.08 - 553.53 ) | 199.4 ( 731.13 ) | 184.7 ( 78.72 ) | 7.53 ( 6.18 ) |
| Staphylococcal Infection | 4 | 3.99 ( 1.5 - 10.66 ) | 3.99 ( 8.95 ) | 3.98 ( 1.75 ) | 1.99 ( 0.7 ) |
| Eye Infection | 4 | 8.51 ( 3.19 - 22.74 ) | 8.5 ( 26.38 ) | 8.47 ( 3.72 ) | 3.08 ( 1.79 ) |
| Eye Discharge | 4 | 10.33 ( 3.86 - 27.59 ) | 10.31 ( 33.5 ) | 10.27 ( 4.51 ) | 3.36 ( 2.07 ) |

Abbreviation: ROR, reporting odds ratio; PRR, proportional reporting ratio; EBGM, empirical Bayesian geometric mean; EBGM05, the lower limit of the 95% CI of EBGM; IC, information

Supplementary Table S8: Top 50 most frequent adverse events meeting the positive signal for belumosudil at the PT levels in patients aged > 65 years.

| PT | Case numbers | ROR(95%CI) | PRR(χ2) | EBGM(EBGM05) | IC(IC025) |
| --- | --- | --- | --- | --- | --- |
| Inappropriate Schedule of Product Administration | 77 | 13.34 ( 10.59 - 16.8 ) | 12.63 ( 824.1 ) | 12.57 ( 10.36 ) | 13.34 ( 10.59 - 16.8 ) |
| Product Use in Unapproved Indication | 62 | 11.74 ( 9.1 - 15.16 ) | 11.24 ( 578.52 ) | 11.2 ( 9.04 ) | 11.74 ( 9.1 - 15.16 ) |
| bo | 39 | 2.12 ( 1.54 - 2.92 ) | 2.09 ( 22.46 ) | 2.09 ( 1.6 ) | 2.12 ( 1.54 - 2.92 ) |
| Diarrhoea | 32 | 1.68 ( 1.18 - 2.39 ) | 1.67 ( 8.63 ) | 1.67 ( 1.24 ) | 1.68 ( 1.18 - 2.39 ) |
| Dyspnoea | 24 | 1.75 ( 1.17 - 2.63 ) | 1.74 ( 7.64 ) | 1.74 ( 1.24 ) | 1.75 ( 1.17 - 2.63 ) |
| Condition Aggravated | 22 | 3.29 ( 2.16 - 5.01 ) | 3.25 ( 34.37 ) | 3.25 ( 2.28 ) | 3.29 ( 2.16 - 5.01 ) |
| Asthenia | 20 | 1.91 ( 1.23 - 2.97 ) | 1.89 ( 8.51 ) | 1.89 ( 1.31 ) | 1.91 ( 1.23 - 2.97 ) |
| Pneumonia | 20 | 2.07 ( 1.33 - 3.23 ) | 2.06 ( 10.94 ) | 2.06 ( 1.42 ) | 2.07 ( 1.33 - 3.23 ) |
| Fall | 20 | 1.67 ( 1.07 - 2.59 ) | 1.66 ( 5.26 ) | 1.66 ( 1.14 ) | 1.67 ( 1.07 - 2.59 ) |
| Rash | 16 | 1.79 ( 1.09 - 2.93 ) | 1.78 ( 5.48 ) | 1.78 ( 1.18 ) | 1.79 ( 1.09 - 2.93 ) |
| Cough | 15 | 2 ( 1.2 - 3.32 ) | 1.99 ( 7.39 ) | 1.99 ( 1.3 ) | 2 ( 1.2 - 3.32 ) |
| Decreased Appetite | 13 | 1.76 ( 1.02 - 3.04 ) | 1.75 ( 4.24 ) | 1.75 ( 1.11 ) | 1.76 ( 1.02 - 3.04 ) |
| Muscle Spasms | 11 | 3.1 ( 1.71 - 5.61 ) | 3.08 ( 15.46 ) | 3.08 ( 1.87 ) | 3.1 ( 1.71 - 5.61 ) |
| Peripheral Swelling | 11 | 2.12 ( 1.17 - 3.83 ) | 2.11 ( 6.43 ) | 2.11 ( 1.28 ) | 2.12 ( 1.17 - 3.83 ) |
| Dry Eye | 10 | 9.45 ( 5.07 - 17.63 ) | 9.39 ( 74.75 ) | 9.36 ( 5.56 ) | 9.45 ( 5.07 - 17.63 ) |
| Disease Progression | 8 | 2.51 ( 1.25 - 5.03 ) | 2.5 ( 7.2 ) | 2.5 ( 1.4 ) | 2.51 ( 1.25 - 5.03 ) |
| Loss of Personal Independence in Daily Activities | 8 | 4.49 ( 2.24 - 9.01 ) | 4.47 ( 21.55 ) | 4.46 ( 2.49 ) | 4.49 ( 2.24 - 9.01 ) |
| Haemoglobin Decreased | 8 | 2.78 ( 1.38 - 5.56 ) | 2.77 ( 9.02 ) | 2.76 ( 1.54 ) | 2.78 ( 1.38 - 5.56 ) |
| Abdominal Discomfort | 7 | 2.05 ( 0.98 - 4.32 ) | 2.05 ( 3.76 ) | 2.05 ( 1.1 ) | 2.05 ( 0.98 - 4.32 ) |
| Thrombosis | 7 | 3.15 ( 1.5 - 6.63 ) | 3.14 ( 10.21 ) | 3.14 ( 1.68 ) | 3.15 ( 1.5 - 6.63 ) |
| Spinal Fracture | 6 | 9.33 ( 4.18 - 20.83 ) | 9.29 ( 44.25 ) | 9.26 ( 4.73 ) | 9.33 ( 4.18 - 20.83 ) |
| Dry Mouth | 6 | 3.7 ( 1.66 - 8.26 ) | 3.69 ( 11.76 ) | 3.68 ( 1.88 ) | 3.7 ( 1.66 - 8.26 ) |
| Dysphagia | 5 | 2.33 ( 0.97 - 5.61 ) | 2.33 ( 3.78 ) | 2.33 ( 1.11 ) | 2.33 ( 0.97 - 5.61 ) |
| Stomatitis | 5 | 3.42 ( 1.42 - 8.24 ) | 3.41 ( 8.54 ) | 3.41 ( 1.64 ) | 3.42 ( 1.42 - 8.24 ) |
| Depressed Mood | 5 | 5.59 ( 2.32 - 13.46 ) | 5.57 ( 18.72 ) | 5.56 ( 2.66 ) | 5.59 ( 2.32 - 13.46 ) |
| Gastroenteritis Viral | 5 | 18.79 ( 7.78 - 45.36 ) | 18.73 ( 83.31 ) | 18.6 ( 8.9 ) | 18.79 ( 7.78 - 45.36 ) |
| Lung Disorder | 5 | 3.82 ( 1.58 - 9.19 ) | 3.81 ( 10.34 ) | 3.8 ( 1.82 ) | 3.82 ( 1.58 - 9.19 ) |
| Contusion | 5 | 2.37 ( 0.99 - 5.72 ) | 2.37 ( 3.96 ) | 2.37 ( 1.14 ) | 2.37 ( 0.99 - 5.72 ) |
| Renal Disorder | 5 | 4.05 ( 1.68 - 9.76 ) | 4.04 ( 11.44 ) | 4.04 ( 1.94 ) | 4.05 ( 1.68 - 9.76 ) |
| Hip Fracture | 5 | 3.78 ( 1.57 - 9.1 ) | 3.77 ( 10.16 ) | 3.76 ( 1.8 ) | 3.78 ( 1.57 - 9.1 ) |
| Swelling | 5 | 3.04 ( 1.26 - 7.31 ) | 3.03 ( 6.8 ) | 3.03 ( 1.45 ) | 3.04 ( 1.26 - 7.31 ) |
| Emotional Disorder | 5 | 21.58 ( 8.93 - 52.12 ) | 21.5 ( 96.96 ) | 21.33 ( 10.2 ) | 21.58 ( 8.93 - 52.12 ) |
| Rash Macular | 4 | 5.28 ( 1.98 - 14.09 ) | 5.26 ( 13.79 ) | 5.25 ( 2.31 ) | 5.28 ( 1.98 - 14.09 ) |
| Blister | 4 | 4.01 ( 1.5 - 10.71 ) | 4 ( 9 ) | 4 ( 1.76 ) | 4.01 ( 1.5 - 10.71 ) |
| Oedema | 4 | 3.03 ( 1.13 - 8.08 ) | 3.02 ( 5.4 ) | 3.02 ( 1.33 ) | 3.03 ( 1.13 - 8.08 ) |
| Bacterial Infection | 4 | 8.75 ( 3.27 - 23.38 ) | 8.72 ( 27.27 ) | 8.7 ( 3.82 ) | 8.75 ( 3.27 - 23.38 ) |
| Skin Atrophy | 4 | 24.87 ( 9.28 - 66.68 ) | 24.8 ( 90.52 ) | 24.58 ( 10.77 ) | 24.87 ( 9.28 - 66.68 ) |
| Joint Stiffness | 4 | 10.16 ( 3.8 - 27.17 ) | 10.14 ( 32.82 ) | 10.1 ( 4.44 ) | 10.16 ( 3.8 - 27.17 ) |
| Skin Exfoliation | 4 | 3.04 ( 1.14 - 8.11 ) | 3.03 ( 5.44 ) | 3.03 ( 1.33 ) | 3.04 ( 1.14 - 8.11 ) |
| Bronchitis | 4 | 2.51 ( 0.94 - 6.69 ) | 2.5 ( 3.6 ) | 2.5 ( 1.1 ) | 2.51 ( 0.94 - 6.69 ) |
| Joint Injury | 4 | 6.97 ( 2.61 - 18.63 ) | 6.96 ( 20.35 ) | 6.94 ( 3.05 ) | 6.97 ( 2.61 - 18.63 ) |
| Faeces Soft | 3 | 9.59 ( 3.08 - 29.84 ) | 9.57 ( 22.95 ) | 9.54 ( 3.69 ) | 9.59 ( 3.08 - 29.84 ) |
| Transfusion | 3 | 9.59 ( 3.08 - 29.84 ) | 9.57 ( 22.95 ) | 9.54 ( 3.69 ) | 9.59 ( 3.08 - 29.84 ) |
| Eye Irritation | 3 | 3.08 ( 0.99 - 9.58 ) | 3.08 ( 4.21 ) | 3.08 ( 1.19 ) | 3.08 ( 0.99 - 9.58 ) |
| Choking | 3 | 6.92 ( 2.23 - 21.53 ) | 6.91 ( 15.13 ) | 6.9 ( 2.67 ) | 6.92 ( 2.23 - 21.53 ) |
| Skin Disorder | 3 | 3.86 ( 1.24 - 11.99 ) | 3.85 ( 6.33 ) | 3.85 ( 1.49 ) | 3.86 ( 1.24 - 11.99 ) |
| Limb Injury | 3 | 3.59 ( 1.15 - 11.15 ) | 3.58 ( 5.58 ) | 3.58 ( 1.39 ) | 3.59 ( 1.15 - 11.15 ) |
| Skin Tightness | 3 | 46.71 ( 14.9 - 146.49 ) | 46.61 ( 131.56 ) | 45.81 ( 17.61 ) | 46.71 ( 14.9 - 146.49 ) |
| Lip Pain | 3 | 40.66 ( 12.98 - 127.35 ) | 40.57 ( 114.03 ) | 39.97 ( 15.38 ) | 40.66 ( 12.98 - 127.35 ) |
| Oral Pain | 3 | 5.24 ( 1.69 - 16.29 ) | 5.23 ( 10.25 ) | 5.22 ( 2.02 ) | 5.24 ( 1.69 - 16.29 ) |

Abbreviation: ROR, reporting odds ratio; PRR, proportional reporting ratio; EBGM, empirical Bayesian geometric mean; EBGM05, the lower limit of the 95% CI of EBGM; IC, information
